# Supplementary material
Source: Research Square preprint supplement (doi:10.21203/rs.3.rs-9268352/v1)
Supplement: Supplementary file 1 [file ebc658c204f3958bc7d51798.docx]

**Striking the Balance:**

**Affective Commitment, Ambidexterity and New Venture Performance**

**ONLINE APPENDIX**

**Appendix 1: Data cleaning process and key sample characteristics**

 Figure A.1 summarizes the data cleaning process leading to our final sample.

**Figure A.1.** Cleaning process from raw data to final sample

**
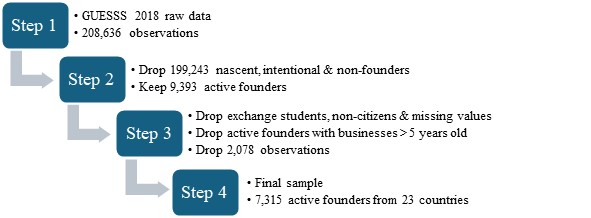
**

Next, Table A.1 reports key founder and startup characteristics in our sample. The average founder age is 24, with an age range spanning 16 to 59 years. The number of male founders slightly exceeds that of female founders. 80% of the founders are undergraduate students. 60% of the founders study on a part-time basis and 40% study full time. In terms of study field, Business Administration (31%) and Engineering (18%) are the most prevalent categories among founders. 47% of the founders run their business without any co-founders, and 42% have 1-2 additional co-founders in their business. 36% of new ventures have no employees, and 94% have less than 5 employees. In addition, Table A.2 reports the distribution of new ventures across sample countries.

**Table A.1.** Key founder and startup characteristics in the sample.

| Gender | % | Age | % | Study level | % | Study field | % |
| --- | --- | --- | --- | --- | --- | --- | --- |
| Female | 45% | 16-20 | 21% | UG/BA | 80% | Business | 31% |
| Male | 55% | 21-25 | 42% | Graduate | 10% | Engineering | 18% |
|  |  | 26-30 | 18% | PhD | 3% | Law & Economics | 10% |
|  |  | 31-35 | 9% | Other | 7% | Sociology | 9% |
|  |  | 36-40 | 5% |  |  | Arts & humanities | 7% |
|  |  | >40 | 5% |  |  | Health sciences | 6% |
|  |  |  |  |  |  | Computer science | 6% |
|  |  |  |  |  |  | Other | 13% |
| Study rhythm | % | Co-founders | % | Employees | % | Founding year | % |
| Part-time | 59% | 0 | 47% | 0 | 36% | 2014 | 8% |
| Full time | 41% | 1 | 26% | 1 | 28% | 2015 | 11% |
|  |  | 2 | 16% | 2 | 15% | 2016 | 18% |
|  |  | >2 | 11% | 3 | 7% | 2017 | 27% |
|  |  |  |  | 4 | 4% | 2018 | 37% |
|  |  |  |  | 5 | 4% |  |  |
|  |  |  |  | >5 | 6% |  |  |

**Table A.2**. Distribution of new ventures across sample countries.

| Country (A-G) | % of total observations | Country (H-S) | % of total observations |
| --- | --- | --- | --- |
| Albania | 0.27 | Hungary | 4.11 |
| Argentina | 4.93 | Ireland | 0.42 |
| Austria | 0.64 | Italy | 2.94 |
| Brazil | 17.01 | Japan | 0.36 |
| Colombia | 23.68 | Kazakhstan | 1.71 |
| Costa Rica | 7.00 | South Korea | 0.53 |
| Czech Republic | 1.05 | Mexico | 6.52 |
| Ecuador | 5.96 | Portugal | 0.68 |
| El Salvador | 1.01 | Russian Federation | 1.58 |
| Germany | 3.07 | South Africa | 3.21 |
| Greece | 0.51 | Spain | 11.35 |
|  |  | Switzerland | 1.45 |
| N = 7,315. | | | |

**Appendix 2: Control variables**

At the individual level, we control for *founders’ age* because we expect older founders to be more experienced and to have accumulated more human capital, which should translate into a stronger strategic focus on innovative ambidexterity as well as higher new venture performance. *Woman* is a dummy variable measuring the founder’s gender. We expect startups founded by men to be more innovative than female-owned startups, due to an overall higher risk propensity among men, which in turn may fuel business innovation (Weiss et al., 2023). This may translate into performance advantages of new ventures owned by men relative to those owned by women. At the firm level, we control for *firm age*, because we expect older ventures to be more innovative and perform better due to having more business and industry experience, combined with an overall larger resource base. *Firm size* measures the number of employees in the new venture. We expect larger firms to be equipped with more resources, which should spur business innovation and increase performance. We also control for the *number of co-owners* in the firm, as we expect a larger number of new venture founders to have positive effects on innovation and performance due to there being a larger pool of human capital within the firm. Next, we control for *Environmental dynamism* to reflect the competitive and customer dynamics in the economic sector in which the startup operates. GUESSS respondents were asked about their *level of agreement with the following statements about the economic sector where their company is mainly active (1=strongly disagree, 7=strongly agree)*. (1) Customer preferences are continually evolving in our industry; (2) Customer demand for our products/services varies continuously; (3) Other businesses are continually introducing new products to our market; (4) Other businesses are continually devising new selling strategies in our market. Our construct contains the average scores of the four items (α = 0.83). While we expect such environmental dynamism to be positively associated with innovation ambidexterity strategy, we do not expect to see a clear relationship with new venture performance. At the country level, we control for average *GDP per capita* as well as average *GDP per capita growth*, during the period 2014-2018. We expect a favourable macroeconomic environment to promote an innovation ambidexterity strategy and contribute to higher new venture performance.

Finally, we include industry and country dummies in our regressions to capture sector-based and country-based unobserved heterogeneity that may contribute to explaining the variation in innovation ambidexterity strategy and performance among startups. The industry controls are based on the GUESSS survey question: *In which economic sector is your business mainly active in?* The respondents selected one out of 13 options, including: Advertising/Design/Marketing, Architecture and Engineering, Construction, Consulting (HR, law, management, tax), Education and training, Financial services (incl. banking, insurance, investment, real estate), Human health and social work activities, Information technology (IT) and communication (incl. software & IT services), Manufacturing, Tourism and leisure, Trade (wholesale/retail), Other services (e.g., transportation), and Other. We created 13 dummies based on these categories and kept 12 of them in our regressions, with “Other” serving as a reference group.

**Appendix 3: Construct reliability and validity**

Our multi-item constructs were evaluated in terms of unidimensionality, validity, and reliability. We dropped two items from the original affective commitment construct due to low factor loadings (see Table 2). As can be verified from Table 2, all remaining items loaded highly significantly onto the respective constructs, with the standardized factor loadings exceeding 0.50. The strong factor loadings provide evidence of unidimensionality and convergent validity. Moreover, the Cronbach alpha reliability scores all exceeded established thresholds of reliability (see Cronbach, 1951; Nunnally, 1978) as did the composite reliability scores (see Fornell & Larcker, 1981). Discriminant validity was assessed using average variance extracted (AVE). It can be observed from Table 2 that all of the constructs except affective commitment featured acceptable AVE scores (Fornell and Larcker, 1981). CFA was performed individually for each construct and then pooled for all constructs simultaneously. Table 2 presents the model indices for each construct separately.

**Table A.3.** Constructs, validity, and reliability.

| Construct | Item | Loading |
| --- | --- | --- |
| Financial Performance | Sales growth | 0.90*** |
|  | Market share growth | 0.89*** |
|  | Profit growth | 0.89*** |
|  | *Model fit indices:* χ*2 = 16907.447; df = 3; probability level = 0.000; RMSEA = 0.000; CFI = 1.000; TLI = 1.000; SRMR = 0.000; CR = 0.817; AVE = 0.599; α = 0.92* |  |
| Affective commitment | I feel as if my business’s problems are my own | 0.50*** |
|  | I would be very happy to spend the rest of my career with my business. | 0.67*** |
|  | My business has great personal meaning for me.  *Model fit indices:* χ*2 = 0.000; df = 0; probability level n/a; RMSEA = 0.000; CFI = 1.000; TLI = 1.000; SRMR = 0.000; CR = 0.7; AVE = 0.423; α = 0.66* | 0.78*** |
| Exploration | Introduce new generation of products/services  Extend product/service range  Open up new markets  Enter new technology fields  *Model fit indices:* χ*2 = 577.789; df = 2; probability level = 0.000; RMSEA = 0.200; CFI = 0.955; TLI = 0.866; SRMR = 0.038; CR = 0.854; AVE = 0.595; α = 0.85* | 0.81***  0.82***  0.75***  0.70*** |
| Exploitation | Improve existing product/service quality | 0.70*** |
|  | Improve flexibility in producing goods/services | 0.77*** |
|  | Reduce cost of producing goods/services | 0.76*** |
|  | Improve yield or reduce material consumption  *Model fit indices:* χ*2 = 1331.009; df = 2; probability level = 0.000; RMSEA = 0.305; CFI = 0.889; TLI = 0.668; SRMR = 0.063; CR = 0.838; AVE = 0.564; α = 0.83* | 0.77*** |
| Market dynamics | Customer preferences are continually evolving in our industry | 0.56*** |
|  | Customer demand for our products/services varies continuously | 0.61*** |
|  | Other businesses are continually introducing new products to our market | 0.89*** |
|  | Other businesses are continually devising new selling strategies in our market  *Model fit indices:* χ*2 = 1416.873; df = 2; probability level = 0.000; RMSEA = 0.313; CFI = 0.898; TLI = 0.693; SRMR = 0.088; CR = 0.832; AVE = 0.563; α = 0.83* | 0.88*** |
| *Note*: For the affective commitment construct, we dropped two additional items from the questionnaire - “I do not feel a sense of belonging to my business” and “I do not feel emotionally attached to my business” - due to low factor loadings (both had been reverse-coded for the analysis). | | |

**Appendix 4: Robustness checks**

**Table A.4**. Regression results for exploration and exploitation strategy mediation of the affective commitment-performance link

|  | Structural equation modelling | | | Sequential equation-by-equation OLS regressions | | | | | |
| --- | --- | --- | --- | --- | --- | --- | --- | --- | --- |
|  | MV1 | MV2 | DV | DV | MV1 | MV2 | DV | DV | DV |
|  | (1) | (2) | (3) | (4) | (5) | (6) | (7) | (8) | (9) |
| *Co-owners* | 0.039 | 0.034 | -0.020 | -0.020 | 0.026 | 0.020 | -0.015 | -0.024 | -0.025 |
|  | (0.012)** | (0.012)** | (0.015) | (0.015) | (0.011)* | (0.013) | (0.008)† | (0.010)* | (0.010)* |
| *Woman* | -0.037 | 0.007 | 0.029 | 0.030 | -0.040 | 0.008 | 0.037 | 0.042 | 0.042 |
|  | (0.027) | (0.027) | (0.034) | (0.034) | (0.056) | (0.050) | (0.059) | (0.047) | (0.047) |
| *Age* | 0.007 | 0.004 | -0.012 | -0.012 | 0.007 | 0.002 | -0.007 | -0.009 | -0.009 |
|  | (0.002)*** | (0.002)† | (0.003)*** | (0.003)*** | (0.002)** | (0.002) | (0.002)** | (0.002)*** | (0.002)*** |
| *Founding year* | 44.779 | 16.349 | -68.882 | -68.925 | 39.874 | 21.033 | -53.163 | -64.251 | -64.381 |
|  | (21.466)* | (21.272) | (26.450)** | (26.447)** | (23.074)† | (14.116) | (24.647)* | (25.699)* | (25.629)* |
| *Employees* | 0.041 | 0.016 | 0.238 | 0.239 | 0.032 | 0.039 | 0.243 | 0.229 | 0.229 |
|  | (0.015)** | (0.015) | (0.019)*** | (0.019)*** | (0.015)* | (0.014)* | (0.023)*** | (0.023)*** | (0.023)*** |
| *Environm. dynamism* | 0.364 | 0.278 | 0.054 | 0.054 | 0.360 | 0.270 | 0.175 | 0.049 | 0.050 |
|  | (0.009)*** | (0.009)*** | (0.013)*** | (0.013)*** | (0.023)*** | (0.019)*** | (0.022)*** | (0.020)* | (0.020)* |
| *GDPPC* | -0.449 | -0.329 | -0.206 | -0.212 | -0.247 | -0.286 | -0.202 | -0.084 | 0.136 |
|  | (0.034)*** | (0.033)*** | (0.042)*** | (0.042)*** | (0.014)*** | (0.013)*** | (0.029)*** | (0.028)** | (0.028)*** |
| *GDPPC growth* | 0.030 | 0.019 | 0.040 | 0.041 | -0.021 | 0.028 | -0.027 | -0.029 | 0.187 |
|  | (0.009)*** | (0.009)* | (0.011)*** | (0.011)*** | (0.004)*** | (0.002)*** | (0.005)*** | (0.005)*** | (0.007)*** |
| *Affective commitment* | 0.234 | 0.201 | 0.109 | 0.108 | 0.230 | 0.200 | 0.190 | 0.105 | 0.104 |
|  | (0.010)*** | (0.010)*** | (0.013)*** | (0.013)*** | (0.023)*** | (0.022)*** | (0.020)*** | (0.016)*** | (0.016)*** |
| *Exploration strategy* |  |  | 0.198 | 0.247 |  |  |  | 0.198 | 0.255 |
|  |  |  | (0.017)*** | (0.041)*** |  |  |  | (0.022)*** | (0.050)*** |
| *Exploitation strategy* |  |  | 0.203 | 0.249 |  |  |  | 0.204 | 0.258 |
|  |  |  | (0.017)*** | (0.039)*** |  |  |  | (0.026)*** | (0.061)*** |
| *Exploration*Exploitation* |  |  |  | -0.009 |  |  |  |  | -0.011 |
|  |  |  |  | (0.007) |  |  |  |  | (0.011) |
| *Industry dummies* | Yes | Yes | Yes | Yes | Yes | Yes | Yes | Yes | Yes |
| *Country dummies* | No | No | No | No | Yes | Yes | Yes | Yes | Yes |
| *R-squared* |  |  |  |  | 0.34 | 0.25 | 0.16 | 0.22 | 0.22 |
| *#obs* | 7,262 | 7,262 | 7,262 | 7,262 | 7,312 | 7,271 | 7,315 | 7, 262 | 7, 262 |
| † p<0.1; * p<0.05; ** p<0.01; *** p<0.001. In Models (1) to (4), estimates are produced using the structural equation modeling framework. In Models (5) to (9), estimates are produced using sequential equation-by-equation OLS regressions. MV1 = mediator 1: exploration strategy. MV2 = mediator 2: exploitation strategy. DV = new venture financial performance. For the industry dummies, the reference group consists of diverse sectors categorized as “Other”. The variables Founding year, Employees, GDP per capita (GDPPC) and GDP per capita growth (GDPPC growth) are measured in logarithmic form. | | | | | | | | | |

**Table A.5**. Exploration and exploitation strategy mediation of the affective commitment-performance link

|  | Coefficient | Std.error | z | P>|z| | 95% CI | |
| --- | --- | --- | --- | --- | --- | --- |
|  | *Structural equation modeling results* | | | | | |
| Direct effect (affective commitment🡪performance) | 0.11 | 0.013 | 8.14 | 0.000 | 0.08 | 0.13 |
| Indirect via exploration strategy (a1*b1) | 0.05 | 0.004 | 10.39 | 0.000 | 0.04 | 0.06 |
| Indirect via exploitation strategy (a2*b2) | 0.04 | 0.004 | 10.18 | 0.000 | 0.03 | 0.05 |
| Total indirect | 0.09 | 0.005 | 16.94 | 0.000 | 0.08 | 0.10 |
| Total effect | 0.20 | 0.013 | 14.69 | 0.000 | 0.17 | 0.22 |
| Proportion mediated = 45% (0.09/0.20) |  |  |  |  |  |  |
|  | *Sequential equation-by-equation OLS results* | | | | | |
| Direct effect (affective commitment🡪performance) | 0.11 | 0.016 | 6.74 | 0.000 | 0.07 | 0.14 |
| Indirect via exploration strategy (a1*b1) | 0.02 | 0.004 | 5.52 | 0.000 | 0.01 | 0.03 |
| Indirect via exploitation strategy (a2*b2) | 0.02 | 0.003 | 6.51 | 0.000 | 0.015 | 0.028 |
| Total indirect | 0.04 | 0.007 | 6.45 | 0.000 | 0.03 | 0.06 |
| Total effect | 0.15 | 0.021 | 6.98 | 0.000 | 0.11 | 0.19 |
| Proportion mediated = 26% (0.04/0.15) |  |  |  |  |  |  |
| *Note*: Due to convergence issues, country dummies were dropped in the structural equation model estimations. These dummies were included in the equation-by-equation OLS estimations. Indirect effects were computed using Stata 17’s *nlcom* command. | | | | | | |

**Table A.6.** Bootstrap quantile regression results for exploration and exploitation strategy antecedents.

|  | DV: Exploration strategy (1-3) | | | DV: Exploitation strategy (4-6) | | |
| --- | --- | --- | --- | --- | --- | --- |
|  | (1) | (2) | (3) | (4) | (5) | (6) |
|  | *25th pc* | *50th pc* | *75th pc* | *25th pc* | *50th pc* | *75pc* |
| *Co-owners* | 0.017 | 0.019 | 0.002 | 0.008 | 0.006 | 0.005 |
|  | (0.013) | (0.012) | (0.007) | (0.015) | (0.007) | (0.005) |
| *Woman* | -0.108 | 0.010 | 0.023 | 0.002 | 0.027 | 0.021 |
|  | (0.031)*** | (0.024) | (0.016) | (0.039) | (0.027) | (0.013) |
| *Age* | 0.010 | 0.003 | 0.004 | 0.001 | 0.001 | 0.001 |
|  | (0.003)*** | (0.002)* | (0.001)** | (0.003) | (0.002) | (0.001) |
| *Founding year* | 32.397 | -8.653 | 16.212 | 8.733 | 17.015 | 2.884 |
|  | (28.883) | (19.135) | (11.626) | (39.903) | (16.018) | (9.683) |
| *Employees* | 0.058 | 0.004 | -0.013 | 0.071 | 0.014 | -0.006 |
|  | (0.013)*** | (0.015) | (0.009) | (0.019)*** | (0.009) | (0.005) |
| *Environm.dynamism* | 0.549 | 0.392 | 0.178 | 0.444 | 0.288 | 0.086 |
|  | (0.016)*** | (0.019)*** | (0.015)*** | (0.021)*** | (0.013)*** | (0.015)*** |
| *GDPPC* | -0.050 | -0.257 | -0.477 | -0.396 | -0.300 | -0.576 |
|  | (0.164) | (0.139)† | (0.076)*** | (0.143)** | (0.107)** | (0.127)*** |
| *GDPPC growth* | -0.148 | -0.056 | 0.121 | 0.110 | 0.120 | 0.216 |
|  | (0.063)* | (0.061) | (0.041)** | (0.056)† | (0.045)** | (0.058)*** |
| *Affective commitment* | 0.284 | 0.211 | 0.095 | 0.256 | 0.204 | 0.055 |
|  | (0.014)*** | (0.017)*** | (0.014)*** | (0.020)*** | (0.014)*** | (0.016)*** |
| *Industry dummies* | Yes | Yes | Yes | Yes | Yes | Yes |
| *Country dummies* | Yes | Yes | Yes | Yes | Yes | Yes |
| *Pseudo R-squared* | 0.27 | 0.22 | 0.08 | 0.19 | 0.16 | 0.05 |
| *#obs* | 7,312 | 7,312 | 7,312 | 7,271 | 7,271 | 7,271 |
| † p<0.1; * p<0.05; ** p<0.01; *** p<0.001. In Models (1) to (3), the dependent variable is *exploration strategy*. In Models (4) to (6), the dependent variable is *exploitation strategy*. All specifications were run using bootstrap quantile regression with 20 replications (the default setting in Stata). For the industry dummies, the reference group consists of diverse sectors categorized as “Other”. The variables Founding year, Employees, GDP per capita (GDPPC) and GDP per capita growth (GDPPC growth) are measured in logarithmic form. | | | | | | |

**Table A.7.** Bootstrap quantile regression results for new venture performance antecedents.

|  | (1) | (2) | (3) | (4) | (5) | (6) | (7) | (8) | (9) |
| --- | --- | --- | --- | --- | --- | --- | --- | --- | --- |
|  | *25th pc* | *50th pc* | *75th pc* | *25th pc* | *50th pc* | *75pc* | *25th pc* | *50th pc* | *75pc* |
| *Co-owners* | -0.012 | -0.021 | -0.020 | -0.024 | -0.041 | -0.016 | -0.018 | -0.049 | -0.012 |
|  | (0.021) | (0.018) | (0.019) | (0.021) | (0.019)* | (0.013) | (0.023) | (0.020)* | (0.015) |
| *Woman* | 0.089 | 0.076 | 0.047 | 0.028 | 0.061 | 0.014 | 0.096 | 0.095 | 0.030 |
|  | (0.044)* | (0.038)* | (0.027)† | (0.045) | (0.049) | (0.028) | (0.046)* | (0.047)* | (0.023) |
| *Age* | -0.007 | -0.009 | -0.004 | -0.013 | -0.007 | -0.006 | -0.010 | -0.011 | -0.005 |
|  | (0.004)* | (0.004)† | (0.003) | (0.003)*** | (0.004)† | (0.002)* | (0.004)* | (0.002)*** | (0.003) |
| *Founding year* | -53.672 | -61.845 | -7.763 | -54.506 | -51.827 | -16.510 | -43.406 | -64.269 | -10.663 |
|  | (38.263) | (27.313)* | (19.155) | (35.944) | (35.032) | (22.086) | (33.291) | (28.208)* | (16.518) |
| *Employees* | 0.301 | 0.236 | 0.133 | 0.297 | 0.223 | 0.091 | 0.280 | 0.218 | 0.068 |
|  | (0.028)*** | (0.018)*** | (0.016)*** | (0.027)*** | (0.022)*** | (0.016)*** | (0.040)*** | (0.017)*** | (0.018)*** |
| *Environm.dynamism* | 0.187 | 0.213 | 0.220 | 0.054 | 0.080 | 0.051 | 0.050 | 0.080 | 0.040 |
|  | (0.019)*** | (0.017)*** | (0.019)*** | (0.018)** | (0.017)*** | (0.011)*** | (0.017)** | (0.014)*** | (0.014)** |
| *GDPPC* | 0.264 | 0.001 | -0.124 | 0.357 | 0.268 | -0.048 | 0.336 | 0.254 | -0.061 |
|  | (0.231) | (0.144) | (0.167) | (0.166)* | (0.123)* | (0.104) | (0.171)* | (0.154)† | (0.112) |
| *GDPPC growth* | 0.214 | 0.177 | 0.212 | 0.210 | 0.131 | 0.188 | 0.252 | 0.139 | 0.219 |
|  | (0.064)*** | (0.066)** | (0.065)** | (0.068)** | (0.055)* | (0.043)*** | (0.083)** | (0.057)* | (0.060)*** |
| *Affective commitment* | 0.207 | 0.219 | 0.208 | 0.115 | 0.101 | 0.080 | 0.093 | 0.103 | 0.072 |
|  | (0.022)*** | (0.018)*** | (0.019)*** | (0.018)*** | (0.021)*** | (0.012)*** | (0.021)*** | (0.023)*** | (0.019)*** |
| *Exploration strategy* |  |  |  | 0.201 | 0.225 | 0.266 | 0.483 | 0.249 | 0.036 |
|  |  |  |  | (0.023)*** | (0.022)*** | (0.015)*** | (0.038)*** | (0.112)* | (0.096) |
| *Exploitation strategy* |  |  |  | 0.211 | 0.262 | 0.317 | 0.442 | 0.280 | 0.092 |
|  |  |  |  | (0.023)*** | (0.021)*** | (0.016)*** | (0.042)*** | (0.101)** | (0.079) |
| *Exploration*Exploitation* |  |  |  |  |  |  | -0.053 | -0.005 | 0.044 |
|  |  |  |  |  |  |  | (0.008)*** | (0.018) | (0.016)** |
| *Industry dummies* | Yes | Yes | Yes | Yes | Yes | Yes | Yes | Yes | Yes |
| *Country dummies* | Yes | Yes | Yes | Yes | Yes | Yes | Yes | Yes | Yes |
| *Pseudo R-squared* | 0.07 | 0.10 | 0.10 | 0.09 | 0.14 | 0.16 | 0.10 | 0.14 | 0.16 |
| *#obs* | 7,315 | 7,315 | 7,315 | 7,262 | 7,262 | 7,262 | 7,262 | 7,262 | 7,262 |
| † p<0.1; * p<0.05; ** p<0.01; *** p<0.001. All specifications were run using bootstrap quantile regression with 20 replications (the default setting in Stata). For the industry dummies, the reference group consists of diverse sectors categorized as “Other”. The variables Founding year, Employees, GDP per capita (GDPPC) and GDP per capita growth (GDPPC growth) are measured in logarithmic form. | | | | | | | | | |

**Table A.8.** Quantile mediation bootstrap results for exploration and exploitation strategy mediation.

| **Path type** | **Path** | **Coeff.** | **Bootstrapped SE** | **z** | **P>|z|** | **Normal-based [95% CI]** | |
| --- | --- | --- | --- | --- | --- | --- | --- |
| Indirect 1 (25th pc) | AC🡪Explore🡪NVPp25 | 0.04 | 0.008 | 6.09 | 0.000 | 0.032 | 0. 063 |
| Indirect 2 (25th pc) | AC🡪Exploit🡪NVPp25 | 0.04 | 0.008 | 4.41 | 0.000 | 0.021 | 0.055 |
| Indirect total (25th pc) | Indirect 1 + Indirect 2 | 0.08 | 0.01 | 8.37 | 0.000 | 0.656 | 0.105 |
| Indirect 1 (75th pc) | AC🡪 Explore 🡪NVPp75 | 0.06 | 0.01 | 6.34 | 0.000 | 0.438 | 0.082 |
| Indirect 2 (75th pc) | AC🡪Exploit🡪NVPp75 | 0.06 | 0.01 | 8.87 | 0.000 | 0.049 | 0.075 |
| Indirect total (75th pc) | Indirect 1 + Indirect 2 | 0.12 | 0.01 | 11.44 | 0.000 | 0.105 | 0.148 |
| Difference indirect total | Indirect total p75 – Indirect total p25 | 0.04 | .007 | 5.70 | 0.000 | 0.027 | 0.055 |
| *Notes*: Bootstrap based on 100 replications using Stata (Version 17). CI = Confidence Interval. Indirect effect computed using product-of-coefficients approach. AC=affective commitment. NVP=new venture performance. | | | | | | | |

**Table A.9**. Conditional indirect effects of exploration and exploitation strategies in the affective commitment–performance link

|  | **Coefficient** | **Std.error** | **z** | **P>|z|** | **95% CI** | |
| --- | --- | --- | --- | --- | --- | --- |
|  | *Conditional indirect effects for exploration strategy, at high/low levels of exploitation strategy* | | | | | |
| (1) Indirect via *exploration*, at low *exploitation* | 0.046 | 0.006 | 7.58 | 0.000 | 0.034 | 0.059 |
| (2) Indirect via *exploration*, at high *exploitation* | 0.041 | 0.006 | 6.79 | 0.000 | 0.030 | 0.053 |
| (3) Effect difference (2) – (1) | -0.005 | 0.004 | -1.26 | 0.207 | -0.013 | 0.003 |
|  | *Conditional indirect effects for exploitation strategy, at high/low levels of exploration strategy* | | | | | |
| (4) Indirect via *exploitation*, at low *exploration* | 0.041 | 0.004 | 9.62 | 0.000 | 0.032 | 0.049 |
| (5) Indirect via *exploitation*, at high *exploration* | 0.036 | 0.005 | 7.93 | 0.000 | 0.027 | 0.045 |
| (6) Effect difference (5) – (4) | -0.004 | 0.003 | -1.25 | 0.212 | -0.011 | 0.002 |
| *Note*: The table reports bootstrap estimates (100 replications) of conditional indirect effects of affective commitment on new venture performance via exploration and exploitation strategies. Indirect effects are computed at low and high levels (25th and 75th percentiles) of the counterpart strategy (i.e., exploitation for the exploration path, and exploration for the exploitation path). This analysis provides additional insight into how the indirect relationships vary across different configurations of innovation strategies. | | | | | | |

**Table A.10.** Quantile-based conditional indirect effects of exploration and exploitation strategies in the affective commitment–performance link

|  | **Coeff.** | **Std.err.** | **Z** | **P>|z|** | **95% CI** |  |
| --- | --- | --- | --- | --- | --- | --- |
| *Conditional indirect effects for exploration strategy, at high/low levels of exploitation strategy & 25th percentile of performance* | | | | | | |
| (1) Indirect via *exploration* (at low *exploitation,* low *NVP)* | 0.050 | 0.008 | 6.16 | 0.000 | 0.034 | 0.066 |
| (2) Indirect via *exploration* (at high *exploitation, low* NVP) | 0.026 | 0.008 | 3.09 | 0.002 | 0.009 | 0.042 |
| (3) Effect difference (2) – (1) | -0.024 | 0.005 | -4.67 | 0.000 | -0.035 | -0.014 |
| *Conditional indirect effects for exploitation strategy, at high/low levels of exploration strategy & 25th percentile of performance* | | | | | | |
| (4) Indirect via *exploitation* (at low *exploration*, low *NVP)* | 0.036 | 0.008 | 4.40 | 0.000 | 0.020 | 0.051 |
| (5) Indirect via *exploitation* (at high *exploration,* low *NVP)* | 0.014 | 0.009 | 1.55 | 0.122 | -0.004 | 0.032 |
| (6) Effect difference (5) – (4) | -0.021 | 0.004 | -4.91 | 0.000 | -0.030 | -0.013 |
| *Conditional indirect effects for exploration strategy, at high/low levels of exploitation strategy & 75th percentile of performance* | | | | | | |
| (7) Indirect via *exploration* (at low *exploitation,* high *NVP)* | 0.058 | 0.010 | 5.79 | 0.000 | 0.038 | 0.078 |
| (8) Indirect via *exploration* (at high *exploitation, high* NVP) | 0.078 | 0.010 | 7.49 | 0.000 | 0.058 | 0.099 |
| (9) Effect difference (8) – (7) | 0.020 | 0.004 | 4.98 | 0.000 | 0.012 | 0.028 |
| *Conditional indirect effects for exploitation strategy, at high/low levels of exploration strategy & 75th percentile of performance* | | | | | | |
| (10) Indirect via *exploitation* (at low *exploration*, high *NVP)* | 0.062 | 0.008 | 7.27 | 0.000 | 0.045 | 0.079 |
| (11) Indirect via *exploitation* (at high *exploration,* high *NVP)* | 0.079 | 0.008 | 9.50 | 0.000 | 0.063 | 0.096 |
| (12) Effect difference (11) – (10) | 0.017 | 0.003 | 4.66 | 0.000 | 0.010 | 0.024 |
| *Note*: The table reports bootstrap estimates (100 replications) of conditional indirect effects of affective commitment on new venture performance via exploration and exploitation strategies at the 25th and 75th percentiles of the performance distribution. Indirect effects are computed at low and high levels (25th and 75th percentiles) of the counterpart strategy. This quantile-based approach captures how the strength of indirect relationships varies jointly across the distribution of venture performance and across different configurations of exploration and exploitation. | | | | | | |
